# Supplementary material
Source: HighWire-hosted journal article supplement (https://srh.bmj.com/highwire/filestream/143061/field_highwire_adjunct_files/0/bmjsrh-2023-201875supp001_data_supplement.pdf)
Supplement: bmjsrh-2023-201875supp001_data_supplement.pdf [file bmjsrh-2023-201875supp001_data_supplement.pdf]

**Reversal of medication abortion with progesterone: a systematic review****Supplementary File 1: search strategies****MAIN SEARCH**

## PUBMED

1. "abortion, induced"[MeSH Terms] OR "abort\*"[Title/Abstract] OR "terminat\*"[Title/Abstract] OR "medical abortion"[Title/Abstract] OR "medication abortion"[Title/Abstract] OR "termination of pregnancy"[Title/Abstract] OR "pregnancy termination"[Title/Abstract] OR "pregnancy terminations"[Title/Abstract] OR "chemical abortion"[Title/Abstract] OR "abortion pill"[Title/Abstract]
2. "abortifacient agents, steroidal"[MeSH Terms] OR "Mifepristone"[MeSH Terms] OR "Mifepristone"[Title/Abstract] OR "mifegyne"[Title/Abstract] OR "mifeprex"[Title/Abstract] OR "r-38486"[Title/Abstract] OR "r38486"[Title/Abstract] OR "r-38486"[Title/Abstract] OR "ru 38486"[Title/Abstract] OR "ru-486"[Title/Abstract] OR "ru486"[Title/Abstract] OR "ru-486"[Title/Abstract] OR "ru38486"[Title/Abstract]
3. "revers\*"[Title/Abstract] OR "antidote"[Title/Abstract] OR "antidotes"[MeSH Terms] OR "Progesterone"[MeSH Terms] OR "Progesterone"[Title/Abstract] OR "progestins"[MeSH Terms] OR "progestin\*"[Title/Abstract] OR "progesterone/therapeutic use"[MeSH Terms] OR "embryo survival"[Title/Abstract] OR "developing fetus"[Title/Abstract]
4. "humans" [MeSH Terms]
5. #1 AND #2 AND #3 AND #4

## EMBASE

1. 'abortion'/exp OR 'abortion':ti,ab,kw OR 'menstrual regulation':ti,ab,kw OR 'induced abortion'/exp OR 'termination of pregnancy':ti,ab,kw OR 'termination of pregnancies':ti,ab,kw OR 'pregnancy termination':ti,ab,kw OR 'pregnancy terminations':ti,ab,kw OR 'chemical abortion':ti,ab,kw OR 'medical abortion'/exp OR 'medical abortion':ti,ab,kw OR 'abortion pill':ti,ab,kw
2. 'mifepristone'/exp OR 'mifepristone':ti,ab,kw OR 'mifeprex':ti,ab,kw OR 'ru-486':ti,ab,kw OR 'ru486':ti,ab,kw OR 'mifegyne':ti,ab,kw OR 'ru-38486':ti,ab,kw OR 'zk-98296':ti,ab,kw
3. 'reversal':ti,ab,kw OR 'antidote':ti,ab,kw OR 'antidote'/exp OR 'developing fetus':ti,ab,kw OR 'embryo survival'/exp OR 'embryo survival':ti,ab,kw OR 'progesterone':ti,ab,kw OR 'progesterone/exp' OR 'gestagen'/exp OR 'gestagen':ti,ab,kw OR 'progestin':ti,ab,kw
4. 'human'/de
5. #1 AND #2 AND #3 AND #4

## COCHRANE trials

abortion, induced OR abort\* OR medical abortion OR medication abortion OR termination of pregnancy OR pregnancy termination OR pregnancy terminations OR chemical abortion OR abortion pill

AND

'Abortifacient Agents, Steroidal' OR Mifepristone OR 'ru-486' OR 'ru486' OR 'mifeprex' OR 'mifegyne'

AND

'antidotes' OR 'progesterone' OR 'progestins' OR 'revers\*' OR 'embryo survival' OR 'developing fetus'

## CINAHL

1. MH "abortion, induced" AND TX (abort\* OR terminat\* OR termination of pregnancy OR 'termination of pregnancies' OR 'pregnancy termination' OR 'pregnancy terminations' OR 'chemical abortion' OR 'medical abortion' OR 'medication abortion' OR 'abortion pill')

2. MH "abortifacient agents+" OR (TX "mifepristone" OR "mifegyne" or "mifeprex" OR r38486" OR "r38486" OR r-38486" OR "ru38486" or "ru-496" OR "ru38486" or "zk98296" OR "zk-98296")
3. (MH "progesterone+" OR MH "Progestational hormones") OR (TX rever\* OR "antidote" OR "progesterone" OR "progestin" or "embryo survival")

## GOOGLE SCHOLAR

'Abortion Reversal' – yields 113 – imported 12/8  
 'abortion pill reversal' – yields 60 – imported 12/8  
 'mifepristone reversal' – yields 7 – imported 12/8

## GreyLit.org

'abortion reversal'

**SECONDARY SEARCH**

## PUBMED:

1. "abortion, induced"[MeSH Terms] OR "abort\*"[Title/Abstract] OR "terminat\*"[Title/Abstract] OR "medical abortion"[Title/Abstract] OR "medication abortion"[Title/Abstract] OR "termination of pregnancy"[Title/Abstract] OR "pregnancy termination"[Title/Abstract] OR "pregnancy terminations"[Title/Abstract] OR "chemical abortion"[Title/Abstract] OR "abortion pill"[Title/Abstract]
2. "abortifacient agents, steroidal"[MeSH Terms] OR "Mifepristone"[MeSH Terms] OR "Mifepristone"[Title/Abstract] OR "mifegyne"[Title/Abstract] OR "mifeprex"[Title/Abstract] OR "r-38486"[Title/Abstract] OR "r38486"[Title/Abstract] OR "r-38486"[Title/Abstract] OR "ru 38486"[Title/Abstract] OR "ru-486"[Title/Abstract] OR "ru486"[Title/Abstract] OR "ru-486"[Title/Abstract] OR "ru38486"[Title/Abstract]
3. "humans" [MeSH Terms]
4. #1 AND #2 AND #3

## EMBASE

1. 'abortion'/exp OR 'abortion':ti,ab,kw OR 'menstrual regulation':ti,ab,kw OR 'induced abortion'/exp OR 'termination of pregnancy':ti,ab,kw OR 'termination of pregnancies':ti,ab,kw OR 'pregnancy termination':ti,ab,kw OR 'pregnancy terminations':ti,ab,kw OR 'chemical abortion':ti,ab,kw OR 'medical abortion'/exp OR 'medical abortion':ti,ab,kw OR 'abortion pill':ti,ab,kw
2. 'mifepristone'/exp OR 'mifepristone':ti,ab,kw OR 'mifeprex':ti,ab,kw OR 'ru-486':ti,ab,kw OR 'ru486':ti,ab,kw OR 'mifegyne':ti,ab,kw OR 'ru-38486':ti,ab,kw OR 'zk-98296':ti,ab,kw
3. 'human'/de
4. #1 AND #2 AND #3

## COCHRANE trials

abortion, induced OR abort\* OR medical abortion OR medication abortion OR termination of pregnancy OR pregnancy termination OR pregnancy terminations OR chemical abortion OR abortion pill

AND

'Abortifacient Agents, Steroidal' OR Mifepristone OR 'ru-486' OR 'ru486' OR 'mifeprex' OR 'mifegyne'

## CINAHL

1. MH "abortion, induced" AND TX (abort\* OR terminat\* OR termination of pregnancy OR 'termination of pregnancies' OR 'pregnancy termination OR 'pregnancy terminations' OR 'chemical abortion' OR 'medical abortion' OR 'medication abortion' OR 'abortion pill')
2. MH "abortifacient agents+" OR (TX "mifepristone" OR "mifegyne" or "mifeprex" OR r38486" OR "r38486" OR r-38486" OR "ru38486" or "ru-496" OR "ru38486" or "zk98296" OR "zk-98296")
